# Supplementary material for: LINC02273 Promotes Hepatocellular Carcinoma Progression via Retaining β‐Catenin in the Nucleus to Augment Wnt Signaling
Source: Hindawi journal article supplement (doi:10.1155/2022/9631036), 2022-01-01
Supplement: f1 [file 9631036.f1.docx]

**Table 1.** Clinicopathological characteristics of clinical samples in HCC

| Parameters | Number of cases (%) |
| --- | --- |
| **Gender** |  |
| Female | 5 (16.1) |
| Male | 26 (83.9) |
| **Age (years)** |  |
| < 50 | 12 (38.7) |
| ≥ 50 | 19 (61.3) |
| **T classification** |  |
| T1-T2 | 20 (64.5) |
| T3-T4 | 11 (35.5) |
| **N classification** |  |
| N0 | 31 (100) |
| N1 | 0 (0) |
| **M classification** |  |
| M0 | 30 (96.8) |
| M1 | 1 (3.2) |
| **Stage** |  |
| I-II | 16 (51.6) |
| III-IV | 15 (48.4) |
| **Alpha fetal protein (AFP)** |  |
| ≤ 400 ug/ul | 17 (54.8) |
| > 400 ug/ul | 14 (45.2) |
| **Histologic grade** |  |
| G1-G2 | 25 (80.6) |
| G3-G4 | 6 (19.4) |
| **LINC02273 expression** |  |
| Low | 15 (48.4) |
| High | 16 (51.6) |
| **Recurrence** |  |
| Negative | 13 (41.9) |
| Positive | 18 (58.1) |
| **Status** |  |
| Dead | 19 (61.3) |
| Alive | 12 (38.7) |
